# Supplementary material for: Globally Disseminated Multidrug Resistance Plasmids Revealed by Complete Assembly of Multidrug Resistant Escherichia coli and Klebsiella pneumoniae Genomes from Diarrheal Disease in Botswana
Source: MDPI journal article supplement (doi:10.3390/applmicrobiol2040071), 2022-11-11
Supplement: s1 [file s1]

## Supplementary materials

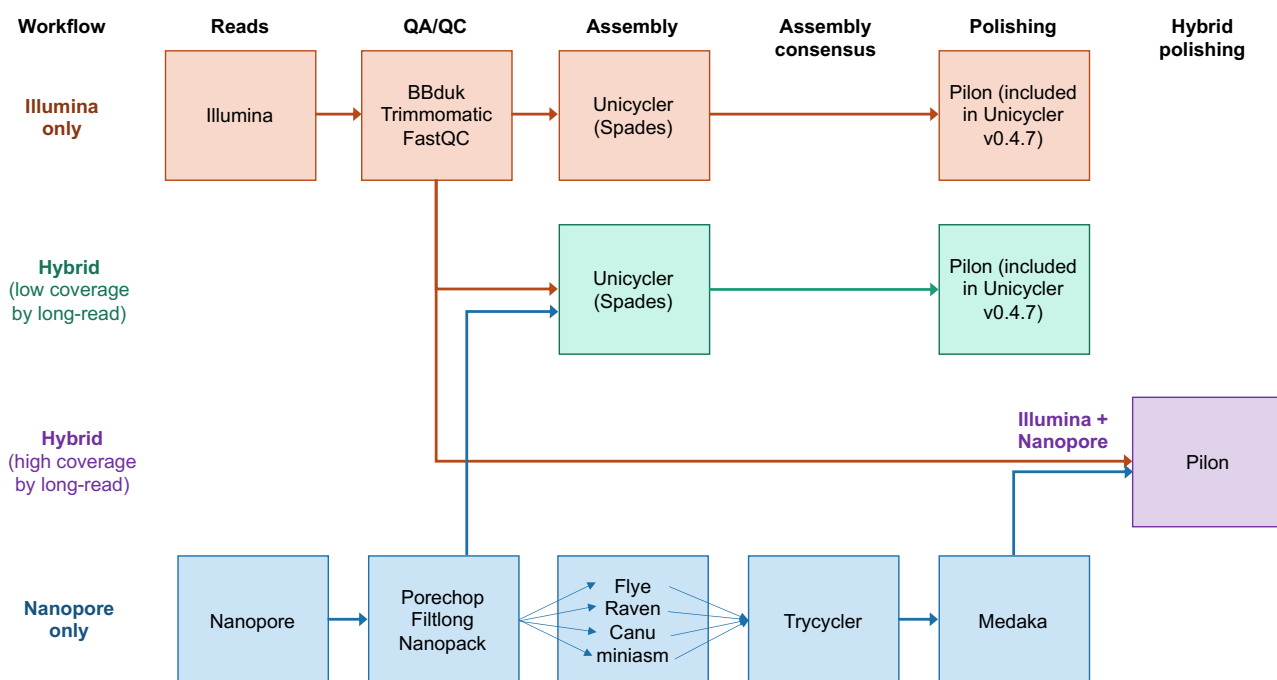

**Figure S1:** Short-read and long-read assembly workflows.

**Table S1: Comparative genomics of pHUM3355 and pHUM7199 plasmids incompatibility (*Inc*), genes associated with replication, conjugative transfer and maintenance/stability**

| Plasmid                               | pHUM3355_A                           | pHUM3355_B                                         | pHUM3355_C                                                       | pHUM7199_A                                           | pHUM7199_B        |
|---------------------------------------|--------------------------------------|----------------------------------------------------|------------------------------------------------------------------|------------------------------------------------------|-------------------|
| <b><i>Inc</i> group</b>               | <i>IncC</i>                          | <i>IncFII/IncFIB/IncQI</i>                         | <i>IncIIa</i>                                                    | <i>IncFIB(K)</i>                                     | <i>IncR</i>       |
| <b>pMLST alleles</b>                  | repA_2, parA_2, parB_2, A053_1       | FII_2                                              | repI1_1, ardA_4, pill_1, sogS_4, trbA_3                          | FIIK_13                                              | FIA_13            |
| <b>Conjugative transfer genes</b>     |                                      |                                                    |                                                                  |                                                      |                   |
| -Relaxase                             | <i>traI</i>                          | <i>traI</i>                                        | <i>nikB</i>                                                      | <i>traI</i>                                          |                   |
| -T4CP                                 | <i>traD</i>                          | <i>traD</i>                                        |                                                                  | <i>traD</i>                                          |                   |
| -ATPase                               |                                      | <i>traC</i>                                        | <i>traU,J, pilQ</i>                                              | <i>traC</i>                                          |                   |
| -T4SS-MPF: Pilus assembly/ biogenesis | <i>tra</i> :L,E,K,B,V,A,C, W,U,F,H,G | <i>tra</i> :L,E,K,B,V,C,W ,U,F,H,A,X               | <i>tra</i> :R,Q,O,M<br><i>pil</i> :V,T,S,,R,N                    | <i>tra</i> :L,E,K,B,V,C,W ,U,F,H,A,X                 |                   |
| -Surface exclusion                    |                                      | <i>tra</i> :S,T                                    | <i>traX</i>                                                      | <i>tra</i> :S,T                                      |                   |
| -Transfer regulators                  |                                      | <i>tra</i> : M,J,Y                                 | <i>traB</i>                                                      | <i>tra</i> :M,J,Y                                    |                   |
| -Fertility inhibition                 |                                      | <i>finO</i>                                        |                                                                  | <i>finO</i>                                          |                   |
| -Other                                | <i>traN</i>                          | <i>tra</i> :P,R,N,Q,G<br><i>trb</i> :G,I,E,A,B,J,F | <i>tra</i> :Y,W,S,P,N,L, K,I,H,G,C,A<br><i>pil</i> :P,U,M,L,,K,I | <i>tra</i> :P,R,N,Q,G<br><i>trb</i> :D,G,I,E,A,B,J,F |                   |
| <b>Maintenance/ stability genes</b>   |                                      |                                                    |                                                                  |                                                      |                   |
| -Partitioning                         | <i>parA, parB</i>                    | <i>parA, parB</i>                                  |                                                                  | <i>parA, parB</i>                                    | <i>parA, parB</i> |
| -Plasmid addiction                    |                                      | <i>phd, doc</i>                                    | <i>psk, phd, doc</i>                                             |                                                      |                   |
| -Plasmid SOS inhibition               |                                      | <i>psiA, psiB</i>                                  | <i>psiA, psiB</i>                                                | <i>psiA, psiB</i>                                    |                   |
| -Anti restriction                     |                                      |                                                    | <i>ardA</i>                                                      |                                                      |                   |

pMLST; plasmid multi-locus sequence typing, T4CP; type IV coupling protein, T4SS-MPF type IV secretion system membrane associated mating pair formation
